# Supplementary material
Source: MDPI journal article supplement (https://www.mdpi.com/2411-5118/4/2/16)
Supplement: s1 [file s1]

We hand-searched for gray literature produced by organizations across global regions that served or conducted research on MSWs. These organizations included: U.S. Department of Health and Human Services, Global Network of Sex Work Projects, Red Umbrella Fund, The Sex Workers Project, Urban Justice Center, Sex Workers Project, Sex Workers Outreach Project USA, Global Network of Sex Work Projects, Sex Workers ' Rights Advocacy Network, International Union of Sex Workers, SWARM Collective, International Committee on the Rights of Sex Workers in Europe, African Sex Workers Alliance, Women's Network for Unity, National Network of Sex Workers, Women's Network for Unity, SistaazHood, Asia Pacific Network of Sex Workers (APNSW), Caribbean Sex Workers Coalition (CSWC), Caribbean Vulnerable Communities, East Africa Sex Workers Alliance (EASWA), International Committee on the Rights of Sex Workers in Europe, Sex Trade Workers Industrial Union 690, Amnesty International, Human Rights Watch, UNAIDS, United Nations Population Fund, World Health Organization, BC Coalition of Experiential Communities, Butterfly - Asian and Migrant Sex Workers Network, Canadian Guild for Erotic Labour, CASWLR (Canadian Alliance for Sex Work Law Reform), Migrant Sex Workers Project, PACE (Providing Alternatives Counselling & Education Society), Peers Victoria Resources Society, POWER (Prostitutes of Ottawa, Gatineau, Work, Educate, Resist), Project L.U.N.E., S.H.O.P. (Safe Harbour Outreach Project), SPOC (Sex Professionals of Canada), Stepping Stone, SWAG (Sex Workers Action Group), SWAN (Sex Workers' Action Network of Waterloo Region), SWAN (Supporting Women's Alternative's Network Vancouver), SWAP Hamilton (Sex Workers' Action Program of Hamilton), Adult Performer Advocacy Committee, BAYSWAN, Best Practices Policy Project, BSWC (The Black Sex Worker Collective), COYOTE, Cupcake Girls, CUSP (Community United for Safety & Protection), Desiree Alliance, ESPLER Project (Sex Workers and Erotic Service Providers Legal Education and Research Project), ESPU (Erotic Service Providers Union), International Sex Worker Foundation for Art, Culture and Education, NJ Red Umbrella Alliance, Prostitutes of New York, Sex Traders Radical Outreach & Liberation Lobby, The Outlaw Project, The Sex Workers Project at the Urban Justice Centre, Scarlet Alliance, SWEAR WA (Sex Work: Education, Advocacy, & Rights Western Australia), SWOP ACT (Australian Capital Territory), Vixen Collective.
